# Supplementary material for: Determining the Effect of Temperature on the Growth and Reproduction of Lasioderma serricorne Using Two-Sex Life Table Analysis
Source: MDPI journal article supplement (doi:10.3390/insects12121103), 2021-12-10
Supplement: s1 [file s1]

**Table S1.** P value of population parameters of *L. serricornis* detected a paired bootstrap test between two temperatures

| Population parameter                         | P (21/24°C) | P (21/27°C) | P (21/30°C) | P (21/33°C) | P (24/27°C) | P (24/30°C) | P (24/33°C) | P (27/30°C) | P (27/33°C) | P (30/33°C) |
|----------------------------------------------|-------------|-------------|-------------|-------------|-------------|-------------|-------------|-------------|-------------|-------------|
| Developmental time of egg (days)             | 0           | 0           | 0           | 0           | 0           | 0           | 0           | 0           | 0           | 0           |
| Developmental time of larva (days)           | 0           | 0           | 0           | 0           | 0           | 0           | 0           | 0           | 0           | 0.03        |
| Developmental time of pupa (days)            | 0           | 0           | 0           | 0           | 0           | 0           | 0           | 0           | 0           | 0.23        |
| Adult longevity (days)                       | 0           | 0           | 0           | 0           | 0           | 0           | 0           | 0           | 0           | 0.00033     |
| Total longevity of female individuals (days) | 0           | 0           | 0           | 0           | 0           | 0           | 0           | 0           | 0           | 0.00665     |
| Total Longevity of male individuals (days)   | 0           | 0           | 0           | 0           | 0           | 0           | 0           | 0           | 0           | 0.015720    |
| Total preoviposition period (TPOp) (days)    | 0           | 0           | 0           | 0           | 0           | 0           | 0           | 0           | 0           | 0.00248     |
| Adult preoviposition period (APOp) (days)    | 0           | 0           | 0           | 0           | 0           | 0           | 0           | 0.54849     | 0.01214     | 0.03338     |
| Oviposition days ( $O_d$ )                   | 0           | 0.00535     | 0           | 0           | 0.00196     | 0.75312     | 0.61484     | 0.00205     | 0.00002     | 0.37408     |
| Fecundity (no. of eggs)                      | 0.00029     | 0.03407     | 0           | 0           | 0.1005      | 0.00298     | 0.00016     | 0.00002     | 0.00001     | 0.23512     |

**Table S2.** P value of population parameters of *L. serricornis* detected a paired bootstrap test between two temperatures

[illegible]
